# Supplementary material
Source: PubMed Central journal article supplement (PMC7997137)

## MATERIAL SUPLEMENTARIO

### **Ausencia de efectos clínicos destacables del SARS-CoV-2 sobre la afinidad de la hemoglobina por el O<sub>2</sub> en pacientes con COVID-19**

#### Métodos

Las ecuaciones utilizadas en los cálculos de la PaO<sub>2</sub> han sido las siguientes (referencias 10-12 del artículo: 10. Kellman GR. J Appl Physiol 1966; 21:1375-6; 11. Severinghaus JW. J Appl Physiol Respir Environ Exerc Physiol 1979; 46:599-602; 12. Siggaard-Andersen O. Contrib Nephrol 1980; 21:128-36. Están resumidas en la figura 1 de la referencia 16 del artículo: 16. Breuer HW et al. Intensive Care Med 1989; 15:385-9). El cálculo se realizó programando dichas ecuaciones dentro del programa SPSS, mediante las instrucciones:

```
TITLE "SEVERINGHAUS COMPLEX FORMULA- CORRECTION FOR pH"
COMPUTE eph=PO2*(EXP(1.1*(pH-7.4))).
EXECUTE.
COMPUTE so2_severinghaus2=((((((eph**3)+(150*eph)**-1)*23400)+1)**-1)*100.
EXECUTE.
```

```
TITLE "KELMAN COMPLEX FORMULA-CORRECTION TEMP pH PCO2"
COMPUTE TEMP=37.
EXECUTE.
COMPUTE PO2CKELMAN= PO2*(10**((0.0024*(37-TEMP))+(0.40*(pH-7.40))+(0.06*(LG10(40)-LG10(PCO2)))).
EXECUTE.
COMPUTE so2_kellman2=100*(-8532.2289*PO2CKELMAN)+(2121.4010*(PO2CKELMAN**2))+(-
67.073989*(PO2CKELMAN**3))+(PO2CKELMAN**4))/(935960.87+(-
31346.258*PO2CKELMAN)+(2396.1674*(PO2CKELMAN**2))+(-
67.104406*(PO2CKELMAN**3))+(PO2CKELMAN**4)).
EXECUTE.
```

```
TITLE "SIGGARD ANDERSEN FORMULA-tang hiperbòlica calculada en SPSS"
COMPUTE P5074=26.85.
COMPUTE P50ACTPH=P5074*(10**-(0.48*(pH-7.4))).
COMPUTE PO20=1.955*P50ACTPH.
COMPUTE SO20=0.867.
COMPUTE K=3.5.
COMPUTE N0=2.87.
COMPUTE NUM= ((N0-1)*LN(PO2/PO20)/K).
COMPUTE TANHNUM=((EXP(NUM)-EXP(-NUM))/(EXP(NUM)+EXP(-NUM))).
COMPUTE F_PO2=LN(SO20/(1-SO20))+LN(PO2/PO20)+K*TANHNUM.
COMPUTE so2_siggard2 = (EXP(FPO2)*100)/(1+EXP(FPO2)).
EXECUTE.
```

*Análisis post-hoc:* En la tabla A y en las figuras A (a) y A (b) de esta suplemento se muestran los valores de las SaO<sub>2</sub> medidas por cooximetría y calculadas a través de las distintas ecuaciones empleadas en el estudio si las gasometrías arteriales se censuran para PaO<sub>2</sub> superiores a 100 mm Hg (ver explicación en el texto del manuscrito).

## TABLA A

Sangre arterial (excluidas las gasometrías con elevadas  $FiO_2$  y  $PaO_2 > 100$  mm Hg)

|                                        | <b>Grupo Control<br/>Histórico</b> | <b>Grupo Control<br/>Sincrónico</b> | <b>Pacientes<br/>COVID-19</b> |
|----------------------------------------|------------------------------------|-------------------------------------|-------------------------------|
| Numero de gasometrías (n)              | 1908                               | 194                                 | 426                           |
| SaO <sub>2</sub> medida (%)            | 93,0±4,9                           | 93,8±4,1                            | 94,0±3,8                      |
| SaO <sub>2</sub> Kellman (%)           | 93,0±5,2                           | 94,0±4,3                            | 94,0±3,8                      |
| SaO <sub>2</sub> Severinghaus (%)      | 92,9±5,1                           | 93,9±4,1                            | 93,9±3,9                      |
| SaO <sub>2</sub> Siggaard-Andersen (%) | 92,8±5,1                           | 93,8±4,1                            | 93,8±3,8                      |

## TABLA B

Valores absolutos de la media de las diferencias y límites de concordancia de los valores de saturación de la hemoglobina medida por oximetría y calculada con las diferentes ecuaciones de predicción utilizadas en el estudio.

|                                        | <b>Arterial</b>   | <b>Venoso</b>    |
|----------------------------------------|-------------------|------------------|
| SaO <sub>2</sub> Kellman (%)           | -0.01[-1.29-1.27] | 0.42[-4.61-4.45] |
| SaO <sub>2</sub> Severinghaus (%)      | 0.01[-1.34-1.37]  | 0.14[-5.07-5.36] |
| SaO <sub>2</sub> Siggaard-Andersen (%) | 0.16[-1.17-1.49]  | 0.10[-5.13-5.33] |

**Figura A.** (a) Relación entre la saturación medida y calculada para las diferentes ecuaciones si se eliminan las  $PaO_2 > 100$  mm Hg. (b) Gráficas de Bland-Altman, si se censuran esos mismos valores. La línea continua representa la media entre los valores medidos y calculados. Las líneas discontinuas representan la media  $\pm 1,96$  x desviación estándar (intervalo de confianza del 95%).

Figura A (a) (suplemento *on line*). Pascual-Guardia et al.

Manuscrito: Ausencia de efectos clínicos destacables del SARS-CoV-2 sobre la afinidad de la hemoglobina por el  $O_2$  en pacientes con COVID-19 y  $PaO_2 > 100$  mm Hg

(a)

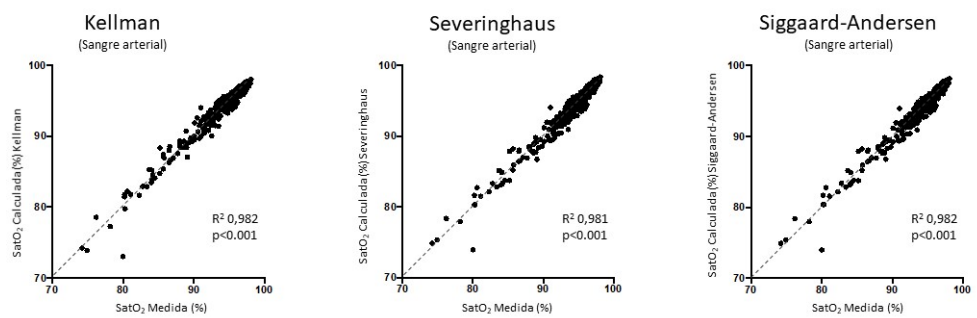

Figura A, (b) (suplemento *on line*). Pascual-Guardia et al.

Manuscrito: Ausencia de efectos clínicos destacables del SARS-CoV-2 sobre la afinidad de la hemoglobina por el  $O_2$  en pacientes con COVID-19 y  $PaO_2 > 100$  mm Hg

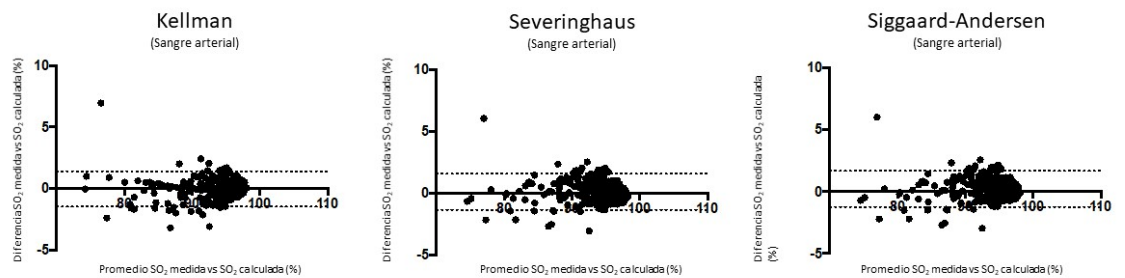

Supplement: mmc1.pdf [file mmc1.pdf]
